# Supplementary material for: Iridium(iii) complexes with polypyridine ligands coordinated as N-heterocyclic carbenes. Synthesis, structure and photophysical properties
Source: Royal Society of Chemistry journal article supplement (doi:10.1039/c2dt31754k), 2012-01-01

Supporting Information for the paper:

## Iridium(III) Complexes with Polypyridine Ligands Coordinated as N-Heterocyclic Carbenes. Synthesis, Structure and Photophysical Properties

Salvador Conejero,<sup>a</sup> Celia Maya,<sup>a</sup> Margarita Paneque,<sup>a</sup> Ana Petronilho,<sup>a</sup> Manuel L. Poveda,<sup>\*a</sup>  
Flores Vattier,<sup>a</sup> Eleuterio Álvarez,<sup>a</sup> Ernesto Carmona,<sup>\*a</sup> Antonio Laguna<sup>\*b</sup> and Olga Crespo<sup>b</sup>

<sup>a</sup> Instituto de Investigaciones Químicas (IIQ), Departamento de Química Inorgánica, CSIC and Universidad de Sevilla, Avda. Américo Vespucio 49, Isla de la Cartuja, Sevilla, 41092, Spain. Fax: 34 954460565; Tel: 34 954489558; E-mail: [guzman@us.es](mailto:guzman@us.es)

<sup>b</sup> Departamento de Química Inorgánica, Instituto de Síntesis Química y Catálisis Homogénea (ISQCH). Universidad de Zaragoza-CSIC, Pedro Cerbuna 12, 50009, Zaragoza, Spain E-mail: [alaguna@unizar.es](mailto:alaguna@unizar.es)

<sup>1</sup>H spectrum of complex **7b**:

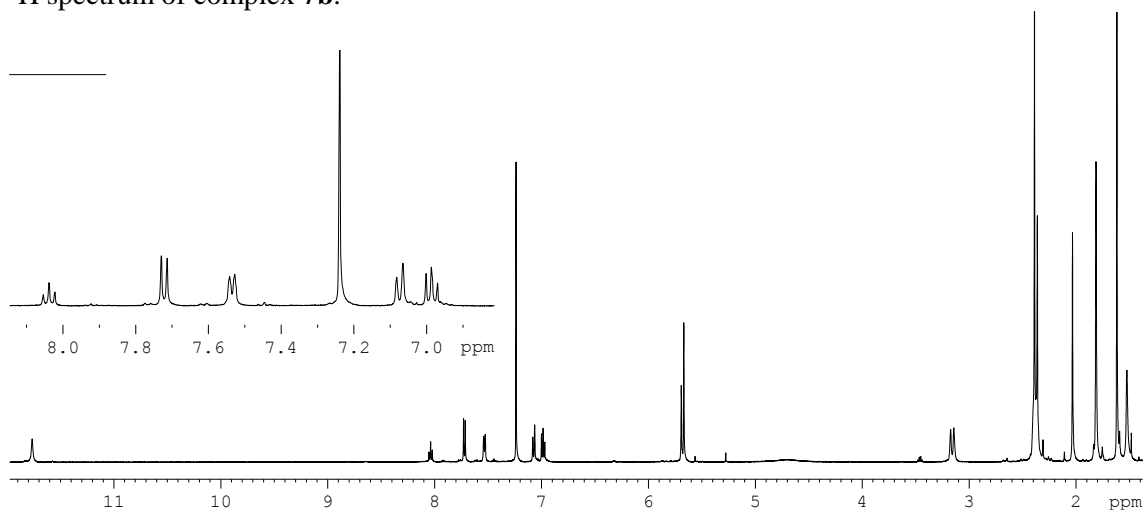

Supplement: c2dt31754k.pdf [file c2dt31754k.pdf]
